# Supplementary material
Source: PubMed Central journal article supplement (PMC3437994)

# VTGGU(Mob)A-COOH

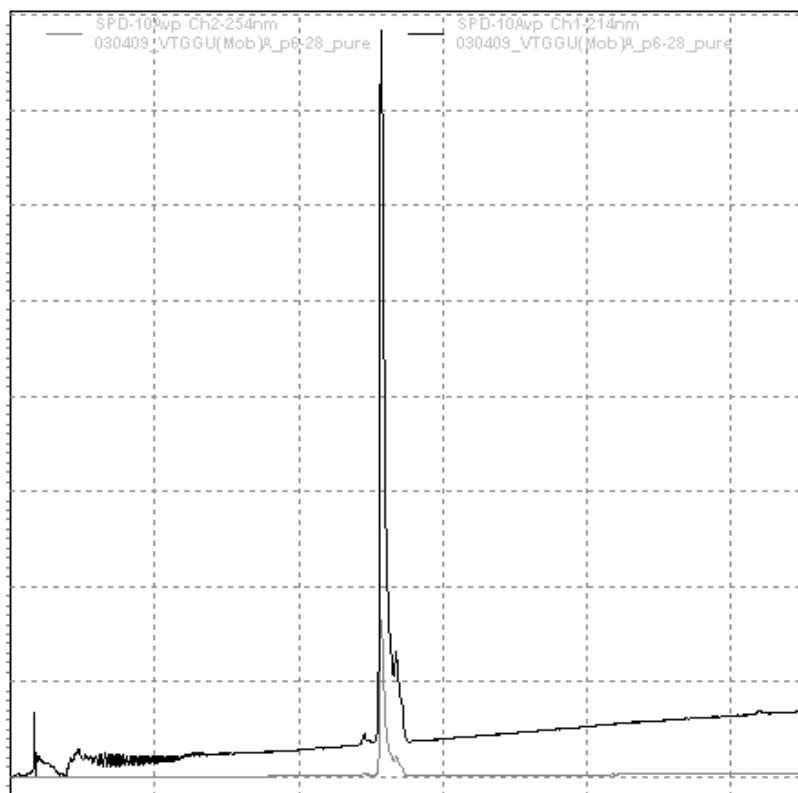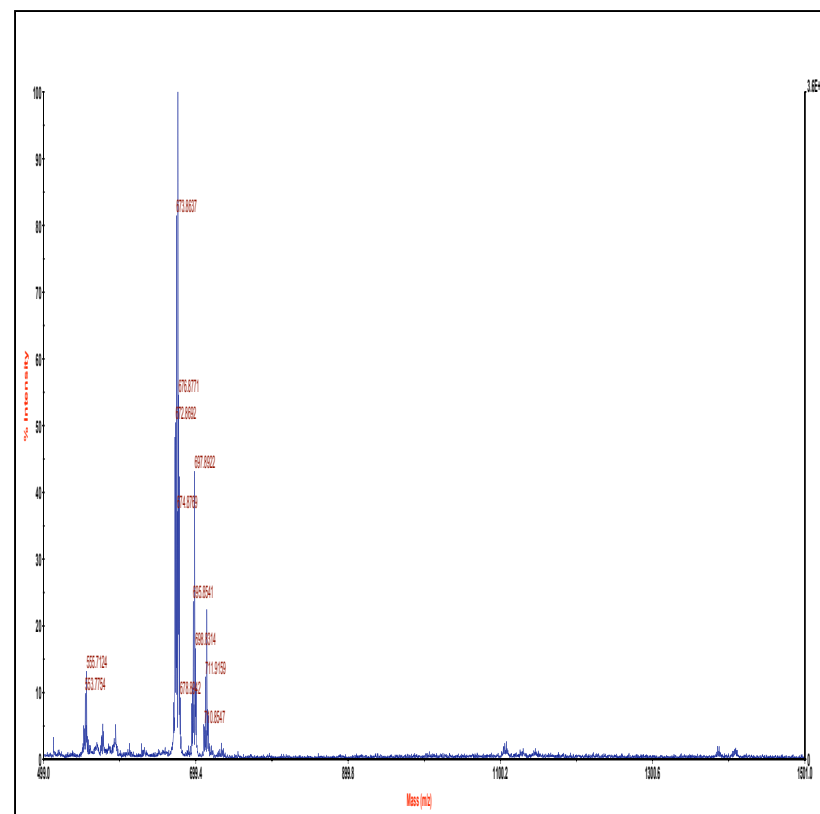

# VTGGU(Meb)A-COOH

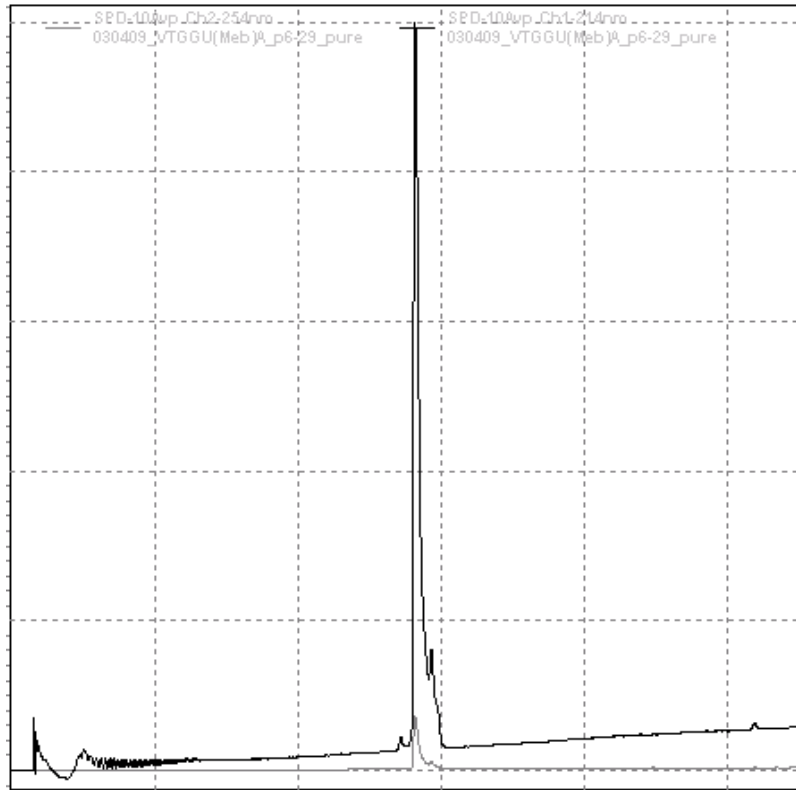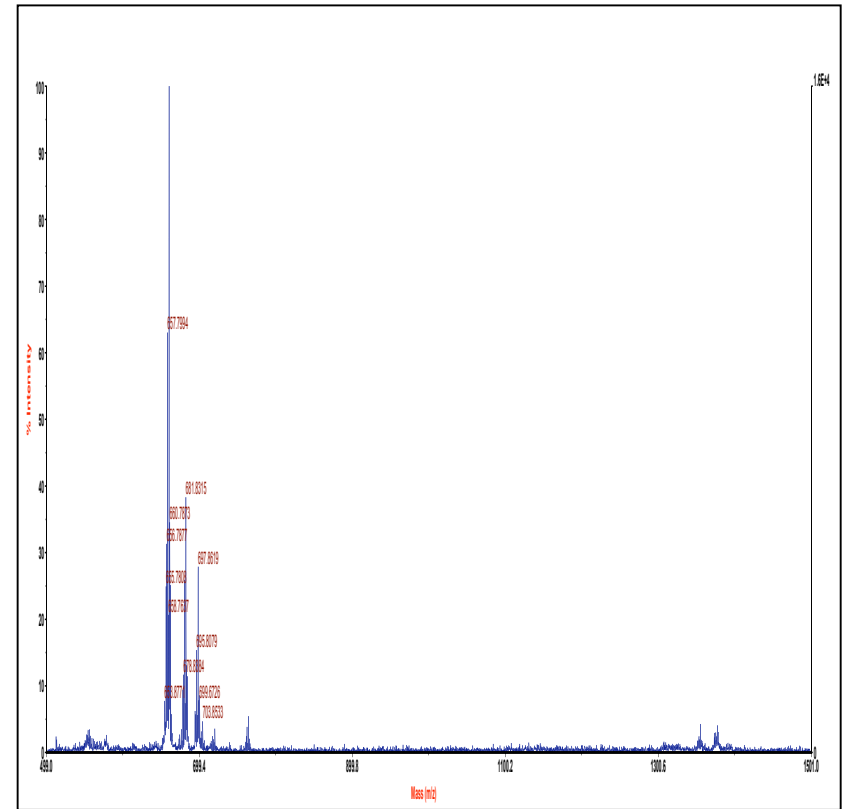

# VTGGU(Bzl)A-COOH

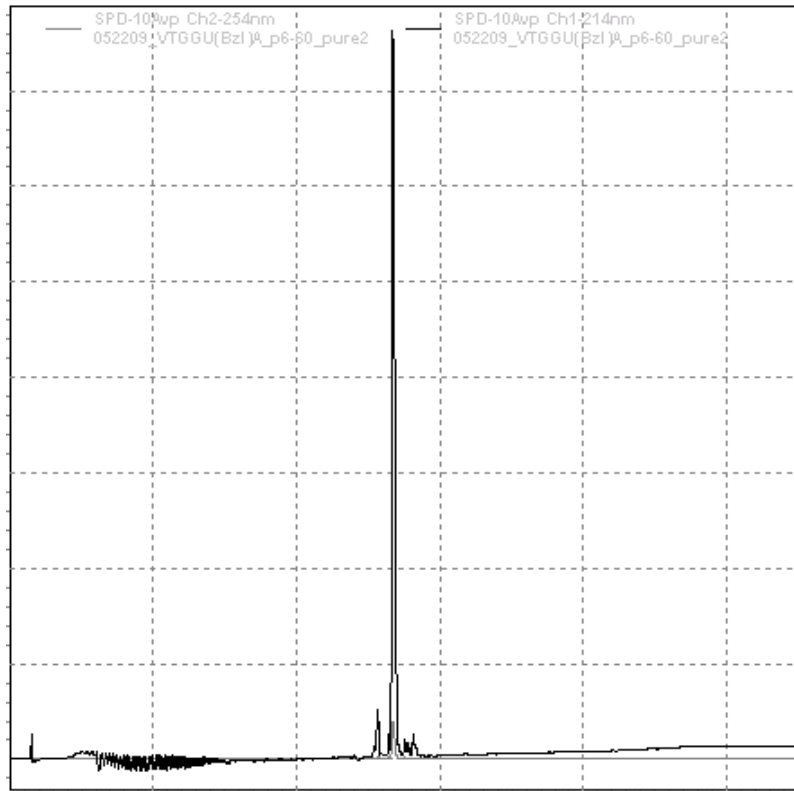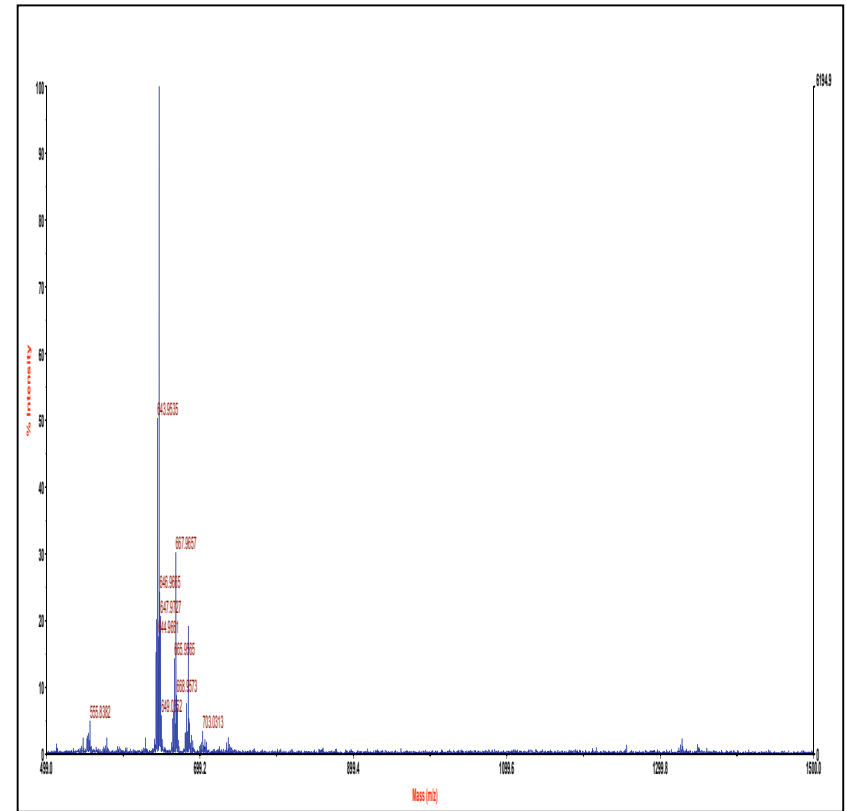

# U(Mob)YIQNU(Mob)PLG-CONH<sub>2</sub>

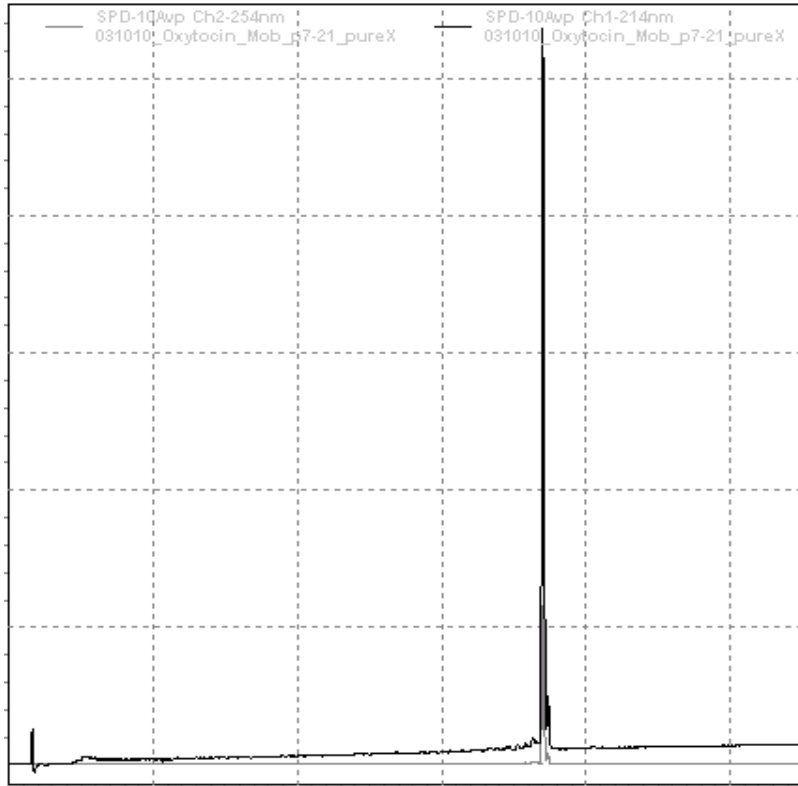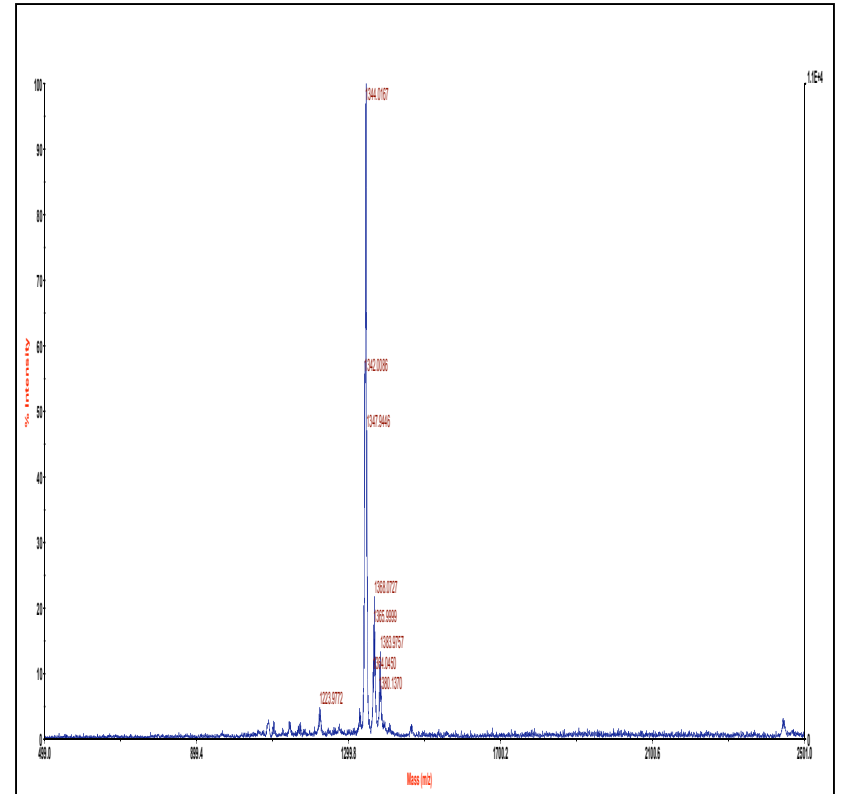

# U(Meb)YIQNU(Meb)PLG-CONH<sub>2</sub>

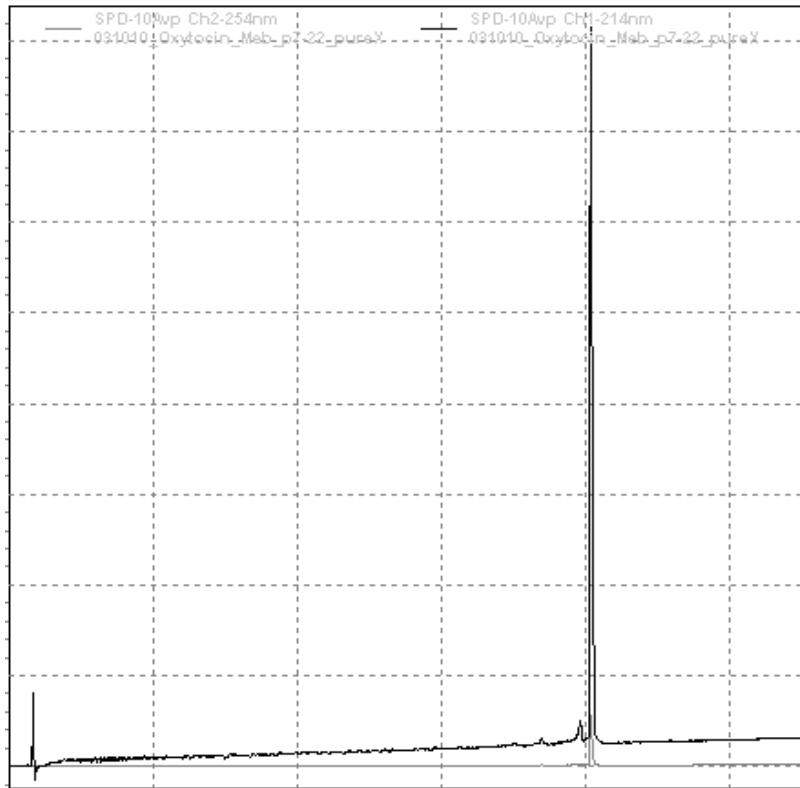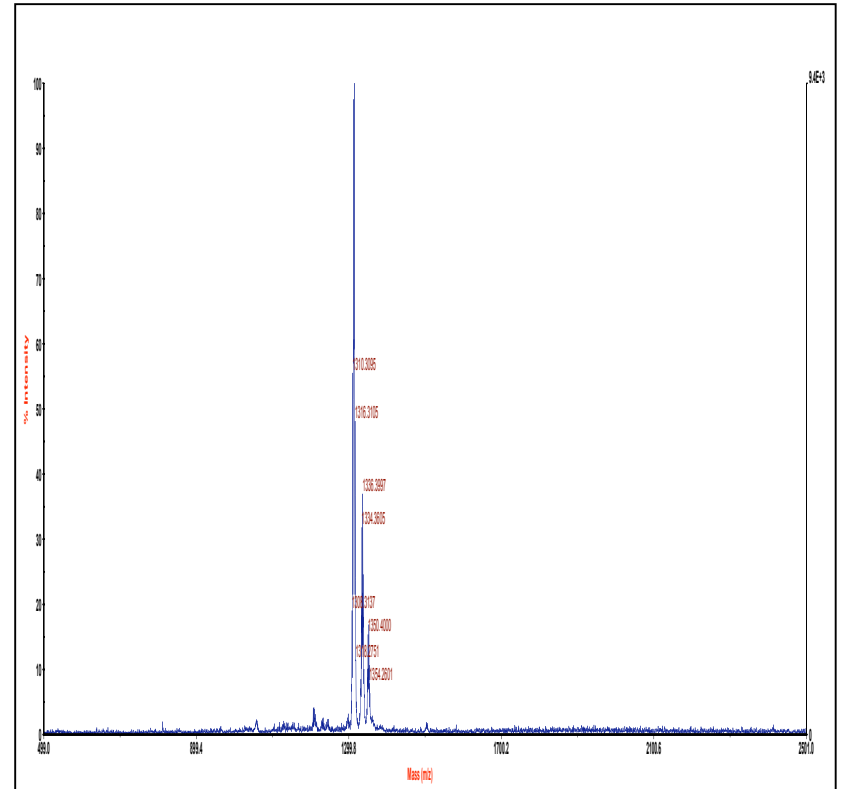

# U(Bzl)YIQNU(Bzl)PLG-CONH<sub>2</sub>

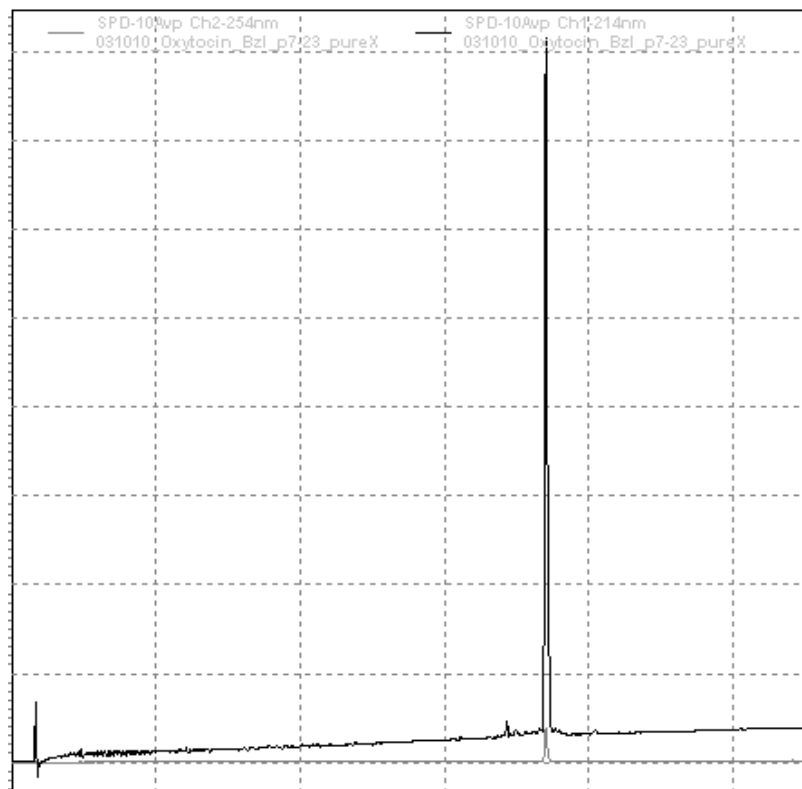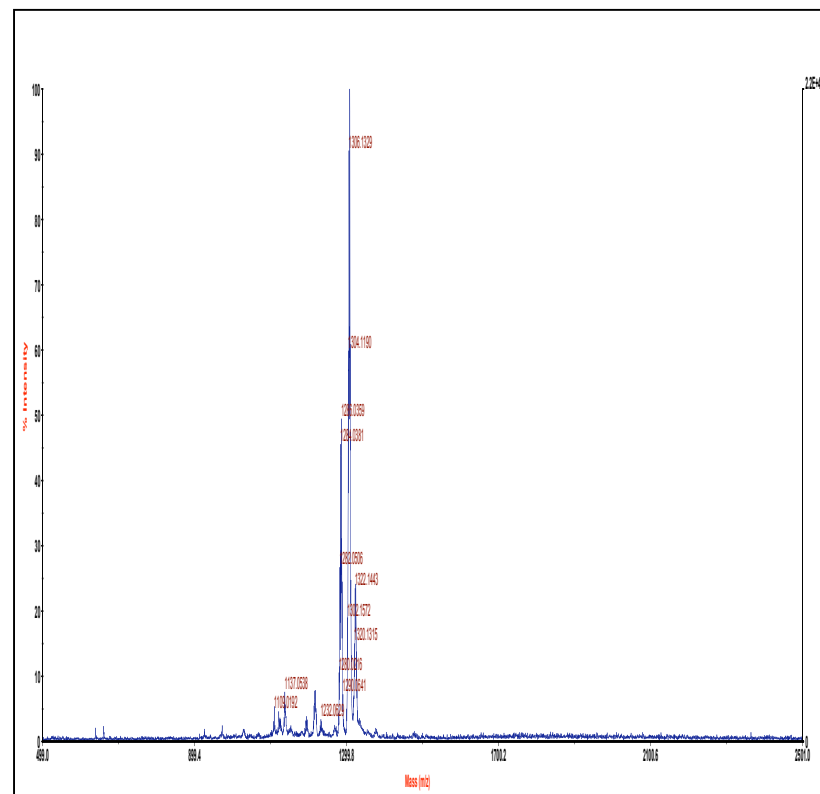

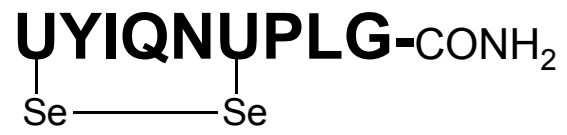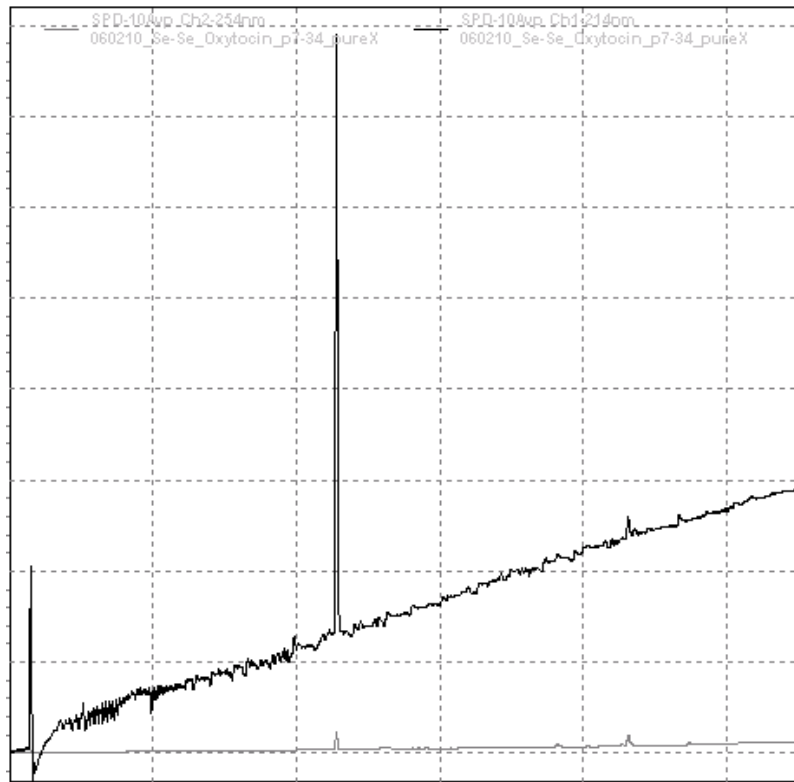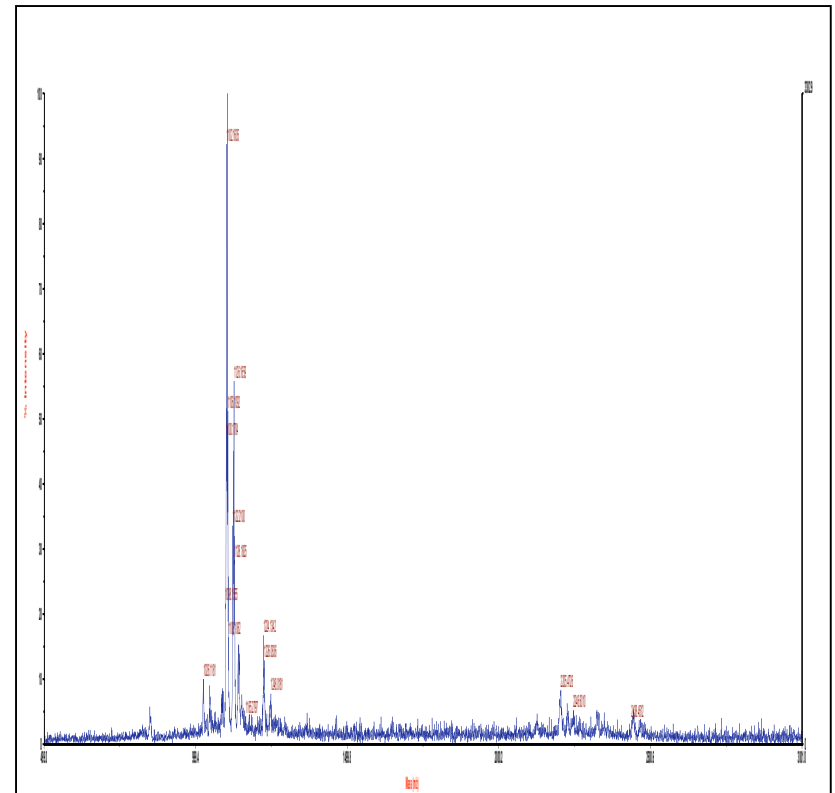

Supplement: NIHMS401068-supplement-pdf.pdf [file NIHMS401068-supplement-pdf.pdf]
